# Supplementary material for: RGD-functionalized ultrasmall iron oxide nanoparticles for targeted T1-weighted MR imaging of gliomas
Source: Royal Society of Chemistry journal article supplement (doi:10.1039/c5nr04003e), 2015-01-01
Supplement: c5nr04003e1.pdf [file c5nr04003e1.pdf]

## Electronic Supplementary Information

### **RGD-functionalized ultrasmall iron oxide nanoparticles for targeted T<sub>1</sub>-weighted MR imaging of glioma**

**Yu Luo,<sup>1a</sup> Jia Yang,<sup>1b</sup> Yu Yan,<sup>a</sup> Jingchao Li,<sup>a</sup> Mingwu Shen,<sup>\*a</sup> Guixiang Zhang,<sup>\*b</sup> Serge Mignani<sup>c</sup> and Xiangyang Shi<sup>\*a</sup>**

<sup>a</sup> College of Chemistry, Chemical Engineering and Biotechnology, Donghua University, Shanghai 201620, People's Republic of China

<sup>b</sup> Department of Radiology, Shanghai General Hospital, School of Medicine, Shanghai Jiaotong University, Shanghai 200080, People's Republic of China

<sup>c</sup> Université Paris Descartes, PRES Sorbonne Paris Cité, CNRS UMR 860, Laboratoire de Chimie et de Biochimie pharmacologiques et toxicologique, 45, rue des Saints Pères, 75006 Paris, France

---

\*To whom correspondence should be addressed. E-mail: xshi@dhu.edu.cn (X. Shi), guixiangzhang@sina.com (G. Zhang), mwshen@dhu.edu.cn (M. Shen),

<sup>1</sup> Authors contributed equally to this work.

**Table S1.** Zeta-potential and hydrodynamic size of the Fe<sub>3</sub>O<sub>4</sub>, Fe<sub>3</sub>O<sub>4</sub>-*m*PEG, and Fe<sub>3</sub>O<sub>4</sub>-PEG-RGD NPs.

| Sample                                        | Zeta potential (mV) | Hydrodynamic size (nm) |
|-----------------------------------------------|---------------------|------------------------|
| Fe <sub>3</sub> O <sub>4</sub>                | -39.7 ± 2.7         | 14.6 ± 1.2             |
| Fe <sub>3</sub> O <sub>4</sub> - <i>m</i> PEG | -8.8 ± 0.6          | 168.7 ± 3.4            |
| Fe <sub>3</sub> O <sub>4</sub> -PEG-RGD       | -10.1 ± 0.4         | 212.5 ± 4.7            |

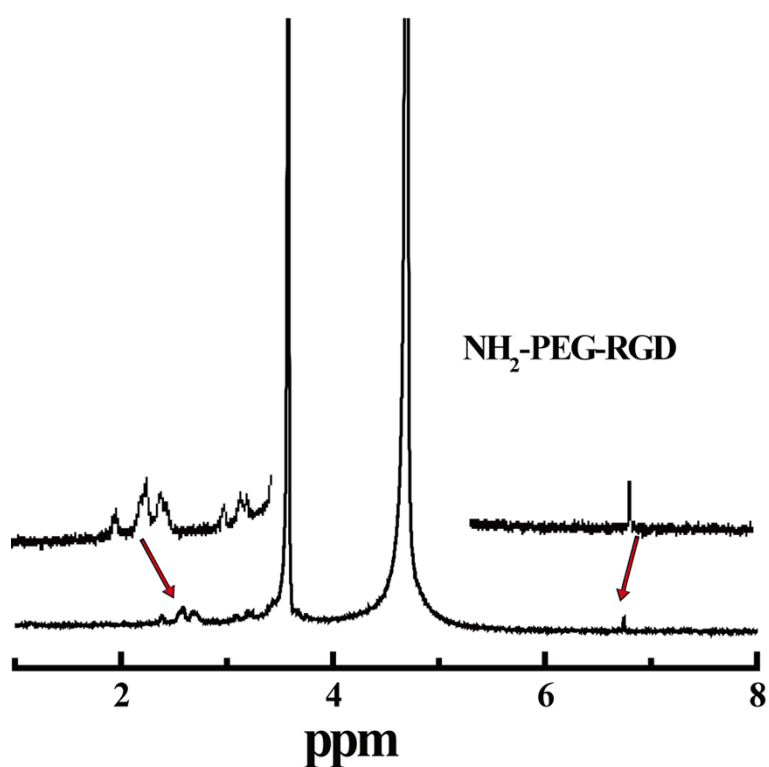

**Figure S1.** <sup>1</sup>H NMR of NH<sub>2</sub>-PEG-RGD dissolved in D<sub>2</sub>O.

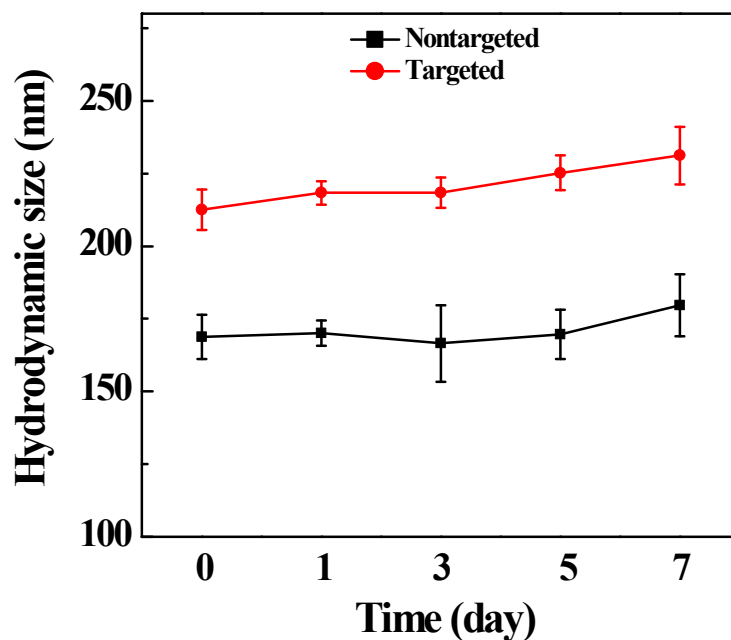

**Figure S2.** Hydrodynamic size of the  $\text{Fe}_3\text{O}_4$ -*m*PEG (Nontargeted) and  $\text{Fe}_3\text{O}_4$ -PEG-RGD (Targeted) NPs (1 mg/mL, dispersed in water) at different time periods.

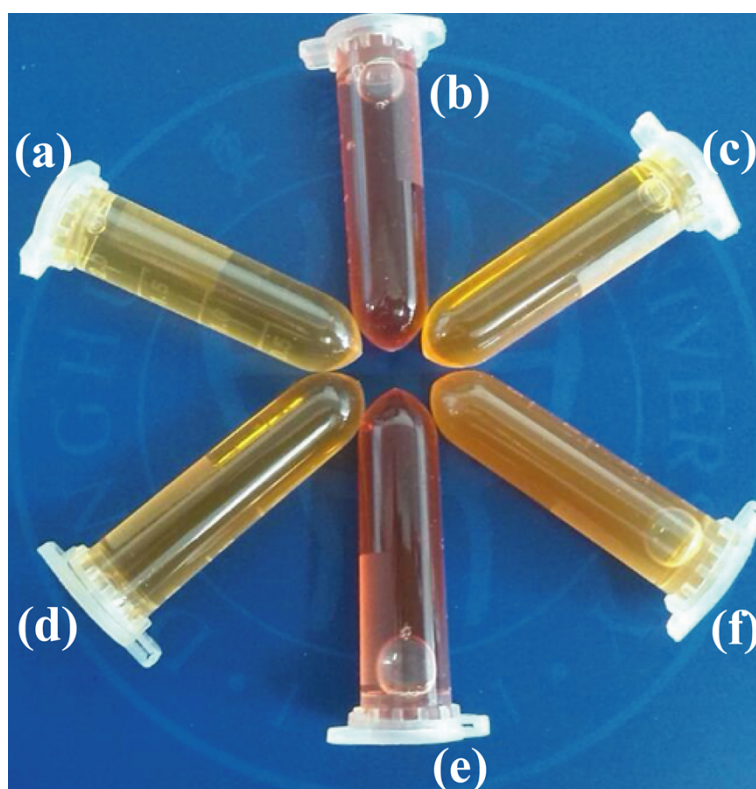

**Figure S3.** Photographs of the  $\text{Fe}_3\text{O}_4$ -*m*PEG (a, b, c) and  $\text{Fe}_3\text{O}_4$ -PEG-RGD (d, e, f) NPs dispersed in water (a, d), cell culture medium (b, e), and PBS (c, f) for two weeks.

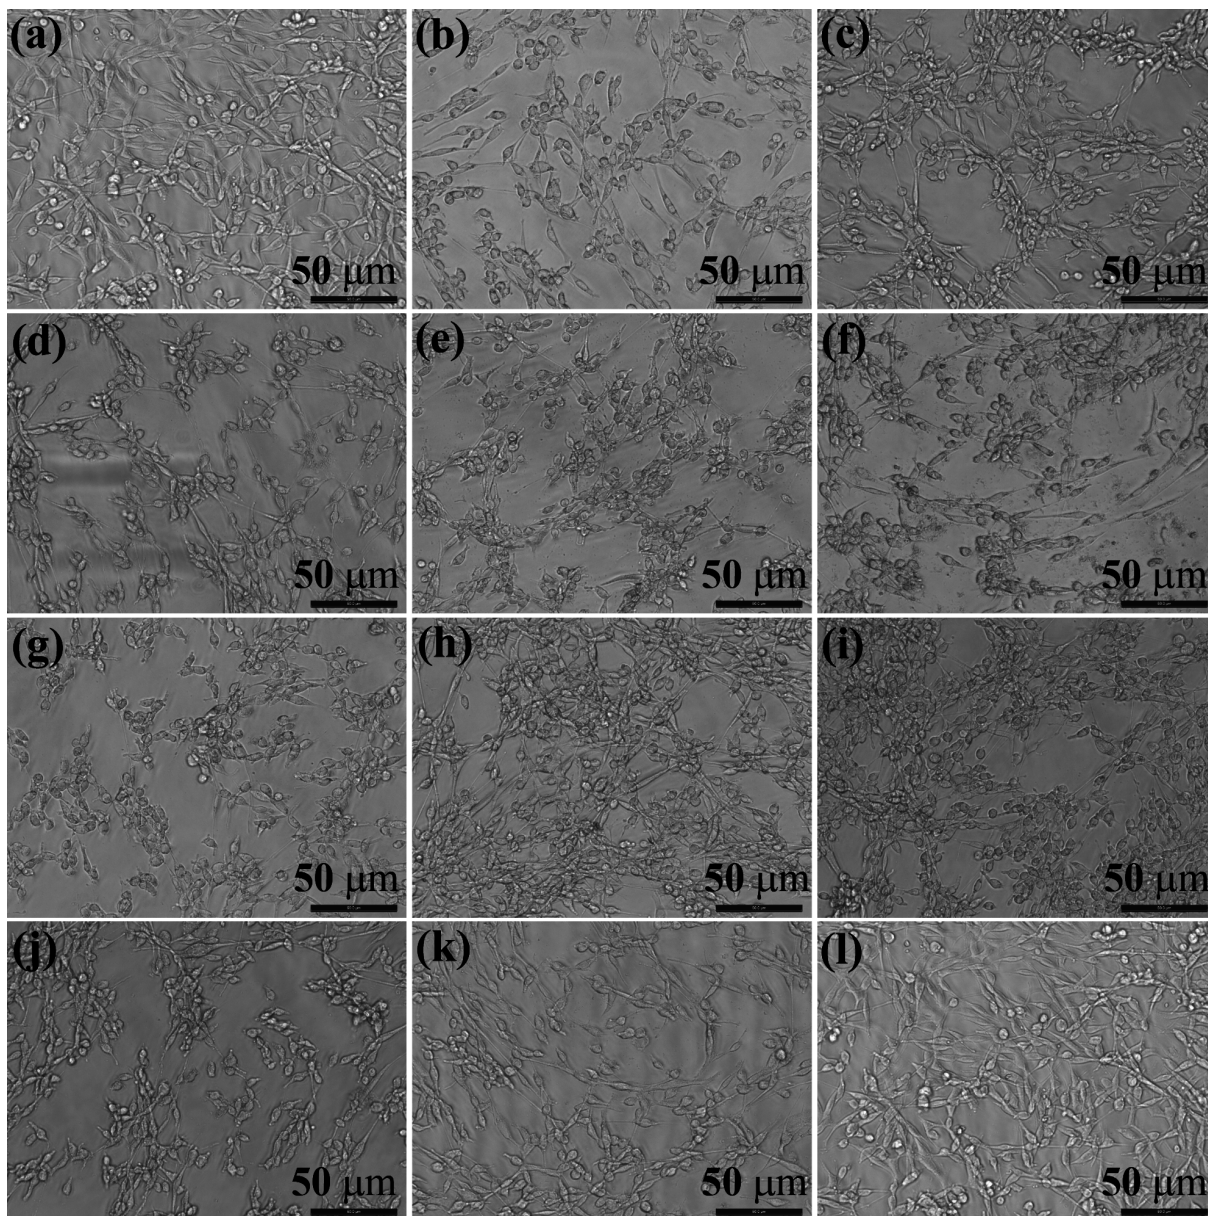

**Figure S4.** Photo micrographs of U87MG cells treated with PBS (a, l), the  $\text{Fe}_3\text{O}_4$ -*m*PEG NPs at the Fe concentrations of 5 (b), 10 (c), 25 (d), 50 (e), and 100 (f)  $\mu\text{g}/\text{mL}$ , and the  $\text{Fe}_3\text{O}_4$ -PEG-RGD NPs at the Fe concentrations of 5 (g), 10 (h), 25 (i), 50 (j), and 100 (k)  $\mu\text{g}/\text{mL}$  for 24 h.

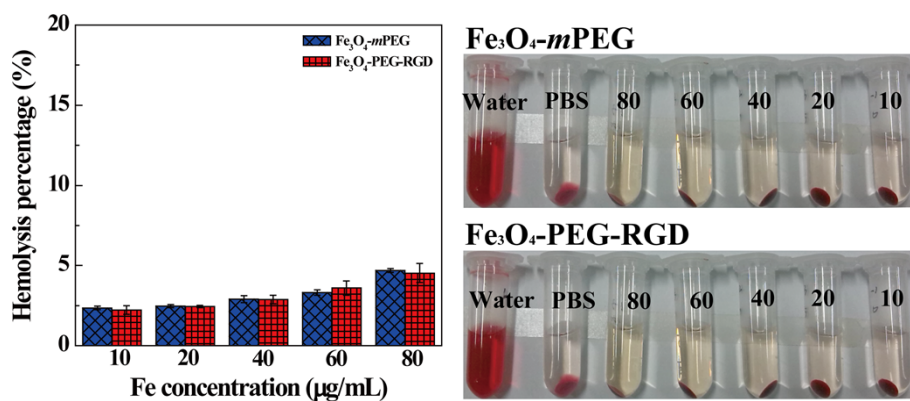

**Figure S5.** Hemolysis percentage (left panel) and photograph (right panel) of the HRBCs treated with the  $\text{Fe}_3\text{O}_4$ -*m*PEG and  $\text{Fe}_3\text{O}_4$ -PEG-RGD NPs with different Fe concentrations. The data are



expressed as mean  $\pm$  SD ( $n = 3$ ). Water and PBS were used positive and negative control, respectively.

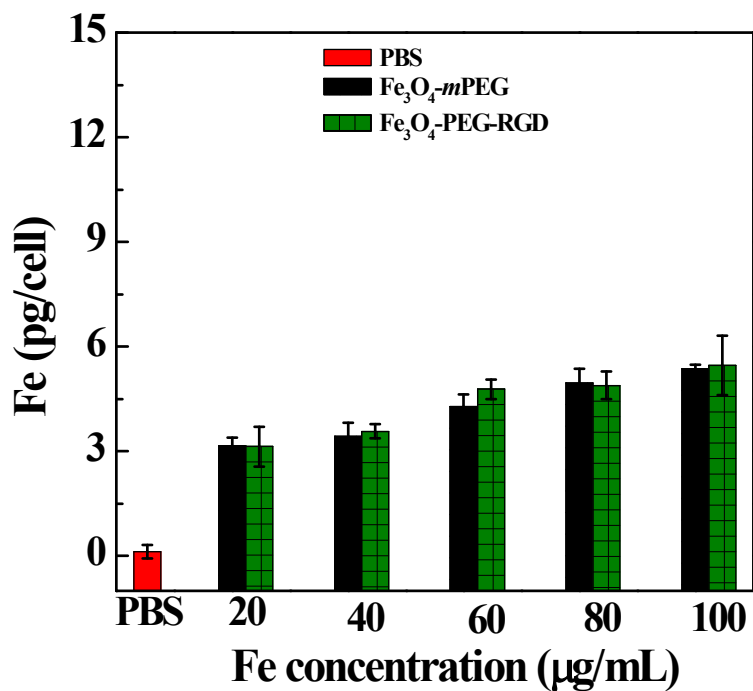

**Figure S6.** The Fe uptake in L929 cells after the cells were treated with the  $\text{Fe}_3\text{O}_4\text{-mPEG}$  or  $\text{Fe}_3\text{O}_4\text{-PEG-RGD}$  NPs with different Fe concentrations for 4 h. L929 cells treated with PBS were used as control.

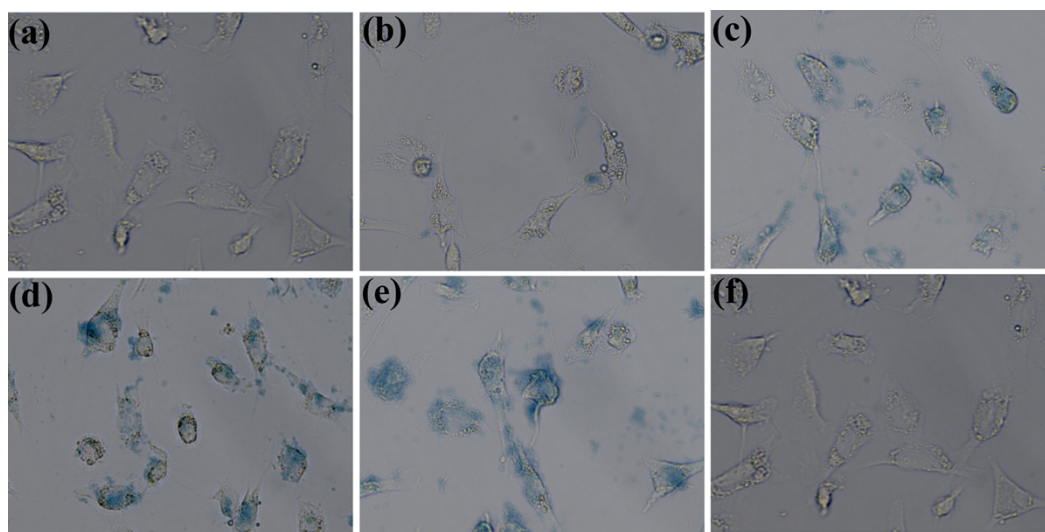

**Figure S7.** Prussian blue staining of U87MG cells after treated with the  $\text{Fe}_3\text{O}_4\text{-mPEG}$  at the Fe concentration of 50 (b) and 100 (c)  $\mu\text{g/mL}$  or  $\text{Fe}_3\text{O}_4\text{-PEG-RGD}$  NPs at the Fe concentration of 50 (d), 100 (e)  $\mu\text{g/mL}$ , respectively for 4 h. U87MG cells treated with PBS were used as control (a and f).
